# Supplementary material for: Psychosocial Effects and Use of Communication Technologies during Home Confinement in the First Wave of the COVID-19 Pandemic in Italy and The Netherlands
Source: MDPI journal article supplement (doi:10.3390/ijerph18052619), 2021-03-05
Supplement: s1 [file s1]

Effetti  
delle  
Misure  
Restrittive  
di  
Isolamento  
sulle  
Abitudini e  
lo Stile di  
Vita  
Durante la  
Pandemia  
COVID-19  
(ECLB-  
COVID19)

Nel Marzo 2020, l'Organizzazione Mondiale della Sanità (OMS) ha valutato che il COVID-19 è da considerarsi una pandemia. L'OMS e le autorità sanitarie nazionali stanno attuando provvedimenti per limitare la diffusione del contagio tramite il confinamento domiciliare. Tuttavia, questa situazione di crisi sta generando grande stress nella popolazione. Il presente questionario si propone di valutare l'effetto di queste misure sul comportamento e sullo stile di vita delle persone durante la pandemia di COVID-19 in diverse nazioni. Identificare i cambiamenti nello stile di vita durante il periodo di isolamento domestico (confrontandoli i dati precedenti), può aiutare nel fornire soluzioni e suggerimenti utili (es. soluzioni informatiche) per mitigare i possibili effetti psicosociali indesiderati delle misure restrittive

### Privacy/Sicurezza dei dati

La protezione e la privacy dei dati è di estrema importanza. Il presente questionario online è anonimo, ed è stato progettato a esclusivo scopo di ricerca. Nel nostro progetto di ricerca riserviamo assoluto riguardo alla privacy dei dati raccolti e ci impegniamo affinché non siano accessibili a terze parti, tenendo in considerazione le più recenti normative di trattamento dei dati. Di conseguenza, le informazioni raccolte nella ECLB-COVID19 sono trattate con assoluta riservatezza. Nel processo di consenso informato, ai partecipanti al questionario è garantito che la raccolta dati avverrà a soli scopi di ricerca e che questi non verranno divulgati o rilasciati a terze parti senza il consenso dell'individuo. è necessario avere almeno 18 anni per partecipare allo studio.

### Consenso di Partecipazione

Completando il presente questionario, acconsente a partecipare in forma anonima allo studio

If you are using your smartphone to answer this questionnaire, please drag the cursor to see all the possible answers

628. Nazionalità \*

---

629. Città di residenza \*

---

630. Genere \*

*Mark only one oval.*☐ Maschio☐ Femmina☐ Other: \_\_\_\_\_

631. Età \*

\_\_\_\_\_

632. Grado di istruzione \*

*Mark only one oval.*☐ Licenza media o inferiori☐ Diploma di Scuola Superiore☐ Scuola Professionale☐ Laurea Triennale☐ Laurea Magistrale/ Ciclo unico

633. Stato civile \*

*Mark only one oval.*☐ Single☐ Sposato/ Convivente☐ Divorziato/Separato/Vedovo

## 634. Occupazione \*

*Check all that apply.*

- ☐ Lavoratore dipendente
- ☐ Libero Professionista
- ☐ Disoccupato
- ☐ Studente
- ☐ In pensione
- ☐ Inabile al lavoro
- ☐ Problemi causati dalla situazione COVID-19

Other: ☐ \_\_\_\_\_

## 635. Qual è il suo attuale stato di salute? \*

*Check all that apply.*

- ☐ In salute
- ☐ A rischio per malattie cardiovascolari: (es: pressione alta, fumo di sigaretta, diabete mellito, obesità, colesterolo alto, sedentarietà ecc)
- ☐ Con malattie cardiovascolari (arterosclerosi, Ictus, Insufficienza cardiaca, malattie cardiache, etc)
- ☐ Con Deterioramento cognitivo

## 636. Di quante persone è composto il suo nucleo familiare (compreso/a lei)? \*

*Mark only one oval per row.*

|                       | 1                     | 2                     | 3                     | 4                     | 5                     | Più di 5              |
|-----------------------|-----------------------|-----------------------|-----------------------|-----------------------|-----------------------|-----------------------|
| Prima dell'isolamento | <input type="radio"/> |
| Durante l'isolamento  | <input type="radio"/> |

## 637. Pensa di avere bisogno di supporto psicosociale? \*

*Mark only one oval per row.*

|                       | Mai                   | Raramente             | A volte               | Spesso                | Sempre                |
|-----------------------|-----------------------|-----------------------|-----------------------|-----------------------|-----------------------|
| Prima dell'isolamento | <input type="radio"/> |
| Durante l'isolamento  | <input type="radio"/> |

Italian adaptation of the Short Life Satisfaction and Mental Well-Being  
Questionnaires

## Italian Adaptation of The Short Life Satisfaction Questionnaire

638. 1. La mia vita è abbastanza vicina al mio ideale \*

*Mark only one oval per row.*

|                       | Del tutto in disaccordo | In disaccordo         | Abbastanza in disaccordo | Né in accordo né in disaccordo | Abbastanza d'accordo  | D'accordo             | D' |
|-----------------------|-------------------------|-----------------------|--------------------------|--------------------------------|-----------------------|-----------------------|----|
| Prima dell'isolamento | <input type="radio"/>   | <input type="radio"/> | <input type="radio"/>    | <input type="radio"/>          | <input type="radio"/> | <input type="radio"/> |    |
| Durante l'isolamento  | <input type="radio"/>   | <input type="radio"/> | <input type="radio"/>    | <input type="radio"/>          | <input type="radio"/> | <input type="radio"/> |    |

639. 2. Ho ottenuto le cose importanti che volevo nella vita \*

*Mark only one oval per row.*

|                       | Del tutto in disaccordo | In disaccordo         | Abbastanza in disaccordo | Né in accordo né in disaccordo | Abbastanza d'accordo  | D'accordo             | D' |
|-----------------------|-------------------------|-----------------------|--------------------------|--------------------------------|-----------------------|-----------------------|----|
| Prima dell'isolamento | <input type="radio"/>   | <input type="radio"/> | <input type="radio"/>    | <input type="radio"/>          | <input type="radio"/> | <input type="radio"/> |    |
| Durante l'isolamento  | <input type="radio"/>   | <input type="radio"/> | <input type="radio"/>    | <input type="radio"/>          | <input type="radio"/> | <input type="radio"/> |    |

640. 3. Sono soddisfatto della mia vita \*

*Mark only one oval per row.*

|                       | Del tutto in disaccordo | In disaccordo         | Abbastanza in disaccordo | Né in accordo né in disaccordo | Abbastanza d'accordo  | D'accordo             | D' |
|-----------------------|-------------------------|-----------------------|--------------------------|--------------------------------|-----------------------|-----------------------|----|
| Prima dell'isolamento | <input type="radio"/>   | <input type="radio"/> | <input type="radio"/>    | <input type="radio"/>          | <input type="radio"/> | <input type="radio"/> |    |
| Durante l'isolamento  | <input type="radio"/>   | <input type="radio"/> | <input type="radio"/>    | <input type="radio"/>          | <input type="radio"/> | <input type="radio"/> |    |

### Versione Italiana della Scala : The Short Warwick-Edinburgh Mental Well-being Scale (SWEMWBS)

641. 1. Mi sono sentito ottimista riguardo al mio futuro \*

*Mark only one oval per row.*

|                       | Mai                   | Raramente             | A volte               | Spesso                | Sempre                |
|-----------------------|-----------------------|-----------------------|-----------------------|-----------------------|-----------------------|
| Prima dell'isolamento | <input type="radio"/> |
| Durante l'isolamento  | <input type="radio"/> |

642. 2. Mi sono sentito utile \*

*Mark only one oval per row.*

|                       | Mai                   | Raramente             | A volte               | Spesso                | Sempre                |
|-----------------------|-----------------------|-----------------------|-----------------------|-----------------------|-----------------------|
| Prima dell'isolamento | <input type="radio"/> |
| Durante l'isolamento  | <input type="radio"/> |

643. 3. Mi sono sentito rilassato \*

*Mark only one oval per row.*

|                       | Mai                   | Raramente             | A volte               | Spesso                | Sempre                |
|-----------------------|-----------------------|-----------------------|-----------------------|-----------------------|-----------------------|
| Prima dell'isolamento | <input type="radio"/> |
| Durante l'isolamento  | <input type="radio"/> |

644. 4. Ho affrontato bene i problemi \*

*Mark only one oval per row.*

|                       | Mai                   | Raramente             | A volte               | Spesso                | Sempre                |
|-----------------------|-----------------------|-----------------------|-----------------------|-----------------------|-----------------------|
| Prima dell'isolamento | <input type="radio"/> |
| Durante l'isolamento  | <input type="radio"/> |

## 645. 5. Ho pensato in modo chiaro \*

*Mark only one oval per row.*

|                       | Mai                   | Raramente             | A volte               | Spesso                | Sempre                |
|-----------------------|-----------------------|-----------------------|-----------------------|-----------------------|-----------------------|
| Prima dell'isolamento | <input type="radio"/> |
| Durante l'isolamento  | <input type="radio"/> |

## 646. 6. Mi sono sentito vicino ad altre persone \*

*Mark only one oval per row.*

|                       | Mai                   | Raramente             | A volte               | Spesso                | Sempre                |
|-----------------------|-----------------------|-----------------------|-----------------------|-----------------------|-----------------------|
| Prima dell'isolamento | <input type="radio"/> |
| Durante l'isolamento  | <input type="radio"/> |

## 647. 7. Sono stato in grado di prendere decisioni \*

*Mark only one oval per row.*

|                       | Mai                   | Raramente             | A volte               | Spesso                | Sempre                |
|-----------------------|-----------------------|-----------------------|-----------------------|-----------------------|-----------------------|
| Prima dell'isolamento | <input type="radio"/> |
| Durante l'isolamento  | <input type="radio"/> |

## Adattamento Italiano della Scala: Social Participation Questionnaire (SPQ)

## 648. 1. Ho fatto visite ai/ricevuto visite dai miei familiari \*

*Mark only one oval per row.*

|                       | Mai                   | Raramente             | A volte               | Spesso                | Sempre                |
|-----------------------|-----------------------|-----------------------|-----------------------|-----------------------|-----------------------|
| Prima dell'isolamento | <input type="radio"/> |
| Durante l'isolamento  | <input type="radio"/> |

649. 2. Ho fatto visite ai/ricevuto visite dai miei vicini/ amici \*

*Mark only one oval per row.*

|                       | Mai                   | Raramente             | A volte               | Spesso                | Sempre                |
|-----------------------|-----------------------|-----------------------|-----------------------|-----------------------|-----------------------|
| Prima dell'isolamento | <input type="radio"/> |
| Durante l'isolamento  | <input type="radio"/> |

650. 3. Ho partecipato ad una funzione/ attività religiosa \*

*Mark only one oval per row.*

|                       | Mai                   | Raramente             | A volte               | Spesso                | Sempre                |
|-----------------------|-----------------------|-----------------------|-----------------------|-----------------------|-----------------------|
| Prima dell'isolamento | <input type="radio"/> |
| Durante l'isolamento  | <input type="radio"/> |

651. 4. Ho usato internet/ i social media per comunicare \*

*Mark only one oval per row.*

|                       | Mai                   | Raramente             | A volte               | Spesso                | Sempre                |
|-----------------------|-----------------------|-----------------------|-----------------------|-----------------------|-----------------------|
| Prima dell'isolamento | <input type="radio"/> |
| Durante l'isolamento  | <input type="radio"/> |

652. 5. Ho fatto una telefonata per comunicazioni sociali \*

*Mark only one oval per row.*

|                       | Mai                   | Raramente             | A volte               | Spesso                | Sempre                |
|-----------------------|-----------------------|-----------------------|-----------------------|-----------------------|-----------------------|
| Prima dell'isolamento | <input type="radio"/> |
| Durante l'isolamento  | <input type="radio"/> |

653. 6. Sono andato in un bar/ ristorante o a una festa \*

Mark only one oval per row.

|                       | Mai                   | Raramente             | A volte               | Spesso                | Sempre                |
|-----------------------|-----------------------|-----------------------|-----------------------|-----------------------|-----------------------|
| Prima dell'isolamento | <input type="radio"/> |
| Durante l'isolamento  | <input type="radio"/> |

654. 7. Sono andato al cinema, a teatro o ad un evento sportivo \*

Mark only one oval per row.

|                       | Mai                   | Raramente             | A volte               | Spesso                | Sempre                |
|-----------------------|-----------------------|-----------------------|-----------------------|-----------------------|-----------------------|
| Prima dell'isolamento | <input type="radio"/> |
| Durante l'isolamento  | <input type="radio"/> |

655. 8. Sono andato/a in palestra/ a lezione di qualche sport \*

Mark only one oval per row.

|                       | Mai                   | Raramente             | A volte               | Spesso                | Sempre                |
|-----------------------|-----------------------|-----------------------|-----------------------|-----------------------|-----------------------|
| Prima dell'isolamento | <input type="radio"/> |
| Durante l'isolamento  | <input type="radio"/> |

656. 9. Ho frequentato una lezione \*

Mark only one oval per row.

|                       | Mai                   | Raramente             | A volte               | Spesso                | Sempre                |
|-----------------------|-----------------------|-----------------------|-----------------------|-----------------------|-----------------------|
| Prima dell'isolamento | <input type="radio"/> |
| Durante l'isolamento  | <input type="radio"/> |

## 657. 10. Ho avuto contatti sociali tramite altre attività \*

*Mark only one oval per row.*

|                       | Mai                   | Raramente             | A volte               | Spesso                | Sempre                |
|-----------------------|-----------------------|-----------------------|-----------------------|-----------------------|-----------------------|
| Prima dell'isolamento | <input type="radio"/> |
| Durante l'isolamento  | <input type="radio"/> |

## 658. 11. Gruppi di studio \*

*Mark only one oval per row.*

|                       | No                    | Sì                    |
|-----------------------|-----------------------|-----------------------|
| Prima dell'isolamento | <input type="radio"/> | <input type="radio"/> |
| Durante l'isolamento  | <input type="radio"/> | <input type="radio"/> |

## 659. 12. Organizzazione o gruppo di volontariato \*

*Mark only one oval per row.*

|                       | No                    | Sì                    |
|-----------------------|-----------------------|-----------------------|
| Prima dell'isolamento | <input type="radio"/> | <input type="radio"/> |
| Durante l'isolamento  | <input type="radio"/> | <input type="radio"/> |

## 660. 13. Gruppo etnico \*

*Mark only one oval per row.*

|                       | No                    | Sì                    |
|-----------------------|-----------------------|-----------------------|
| Prima dell'isolamento | <input type="radio"/> | <input type="radio"/> |
| Durante l'isolamento  | <input type="radio"/> | <input type="radio"/> |

## 661. 14. Altro gruppo (es: sport, servizi etc) \*

*Mark only one oval per row.*

|                       | No                    | Sì                    |
|-----------------------|-----------------------|-----------------------|
| Prima dell'isolamento | <input type="radio"/> | <input type="radio"/> |
| Durante l'isolamento  | <input type="radio"/> | <input type="radio"/> |

## Adattamento Italiano della Scala Short Mood and Feelings Questionnaire (SMFQ)

## 662. 1. Mi sono sentito depresso o infelice \*

*Mark only one oval per row.*

|                       | 0 (non vero)          | 1 (a volte)           | 2 (vero)              |
|-----------------------|-----------------------|-----------------------|-----------------------|
| Prima dell'isolamento | <input type="radio"/> | <input type="radio"/> | <input type="radio"/> |
| Durante l'isolamento  | <input type="radio"/> | <input type="radio"/> | <input type="radio"/> |

## 663. 2. Non ho goduto di niente \*

*Mark only one oval per row.*

|                       | 0 (non vero)          | 1 (a volte)           | 2 (vero)              |
|-----------------------|-----------------------|-----------------------|-----------------------|
| Prima dell'isolamento | <input type="radio"/> | <input type="radio"/> | <input type="radio"/> |
| Durante l'isolamento  | <input type="radio"/> | <input type="radio"/> | <input type="radio"/> |

## 664. 3. Mi sono sentito stanco, ho oziato e non ho fatto nulla \*

*Mark only one oval per row.*

|                       | 0 (non vero)          | 1 (a volte)           | 2 (vero)              |
|-----------------------|-----------------------|-----------------------|-----------------------|
| Prima dell'isolamento | <input type="radio"/> | <input type="radio"/> | <input type="radio"/> |
| Durante l'isolamento  | <input type="radio"/> | <input type="radio"/> | <input type="radio"/> |

## 665. 4. Ero molto inquieto \*

*Mark only one oval per row.*

|                       | 0 (non vero)          | 1 (a volte)           | 2 (vero)              |
|-----------------------|-----------------------|-----------------------|-----------------------|
| Prima dell'isolamento | <input type="radio"/> | <input type="radio"/> | <input type="radio"/> |
| Durante l'isolamento  | <input type="radio"/> | <input type="radio"/> | <input type="radio"/> |

## 666. 5. Mi sono sentito di non valere più nulla \*

*Mark only one oval per row.*

|                       | 0 (non vero)          | 1 (a volte)           | 2 (vero)              |
|-----------------------|-----------------------|-----------------------|-----------------------|
| Prima dell'isolamento | <input type="radio"/> | <input type="radio"/> | <input type="radio"/> |
| Durante l'isolamento  | <input type="radio"/> | <input type="radio"/> | <input type="radio"/> |

## 667. 6. Ho pianto molto \*

*Mark only one oval per row.*

|                       | 0 (non vero)          | 1 (a volte)           | 2 (vero)              |
|-----------------------|-----------------------|-----------------------|-----------------------|
| Prima dell'isolamento | <input type="radio"/> | <input type="radio"/> | <input type="radio"/> |
| Durante l'isolamento  | <input type="radio"/> | <input type="radio"/> | <input type="radio"/> |

## 668. 7. Ho fatto fatica a pensare con chiarezza o a concentrarmi \*

*Mark only one oval per row.*

|                       | 0 (non vero)          | 1 (a volte)           | 2 (vero)              |
|-----------------------|-----------------------|-----------------------|-----------------------|
| Prima dell'isolamento | <input type="radio"/> | <input type="radio"/> | <input type="radio"/> |
| Durante l'isolamento  | <input type="radio"/> | <input type="radio"/> | <input type="radio"/> |

669. 8. Ho odiato me stesso \*

*Mark only one oval per row.*

|                       | 0 (non vero)          | 1 (a volte)           | 2 (vero)              |
|-----------------------|-----------------------|-----------------------|-----------------------|
| Prima dell'isolamento | <input type="radio"/> | <input type="radio"/> | <input type="radio"/> |
| Durante l'isolamento  | <input type="radio"/> | <input type="radio"/> | <input type="radio"/> |

670. 9. Sono stato una persona molto cattiva \*

*Mark only one oval per row.*

|                       | 0 (non vero)          | 1 (a volte)           | 2 (vero)              |
|-----------------------|-----------------------|-----------------------|-----------------------|
| Prima dell'isolamento | <input type="radio"/> | <input type="radio"/> | <input type="radio"/> |
| Durante l'isolamento  | <input type="radio"/> | <input type="radio"/> | <input type="radio"/> |

671. 10. Mi sono sentito solo \*

*Mark only one oval per row.*

|                       | 0 (non vero)          | 1 (a volte)           | 2 (vero)              |
|-----------------------|-----------------------|-----------------------|-----------------------|
| Prima dell'isolamento | <input type="radio"/> | <input type="radio"/> | <input type="radio"/> |
| Durante l'isolamento  | <input type="radio"/> | <input type="radio"/> | <input type="radio"/> |

672. 11. Ho pensato che nessuno mi amasse davvero \*

*Mark only one oval per row.*

|                       | 0 (non vero)          | 1 (a volte)           | 2 (vero)              |
|-----------------------|-----------------------|-----------------------|-----------------------|
| Prima dell'isolamento | <input type="radio"/> | <input type="radio"/> | <input type="radio"/> |
| Durante l'isolamento  | <input type="radio"/> | <input type="radio"/> | <input type="radio"/> |

673. 12. Ho pensato di non poter mai essere all'altezza degli altri \*

Mark only one oval per row.

|                       | 0 (non vero)          | 1 (a volte)           | 2 (vero)              |
|-----------------------|-----------------------|-----------------------|-----------------------|
| Prima dell'isolamento | <input type="radio"/> | <input type="radio"/> | <input type="radio"/> |
| Durante l'isolamento  | <input type="radio"/> | <input type="radio"/> | <input type="radio"/> |

674. 13. Ho sbagliato tutto \*

Mark only one oval per row.

|                       | 0 (non vero)          | 1 (a volte)           | 2 (vero)              |
|-----------------------|-----------------------|-----------------------|-----------------------|
| Prima dell'isolamento | <input type="radio"/> | <input type="radio"/> | <input type="radio"/> |
| Durante l'isolamento  | <input type="radio"/> | <input type="radio"/> | <input type="radio"/> |

Questionario internazionale sull'attività fisica (IPAQ italiano)

Questionario internazionale sull'attività fisica (IPAQ italiano)

675. 1. Su sette giorni, quanti giorni hai svolto attività fisica vigorosa? (Es: sollevare pesi, scavare, aerobica, pedalare veloce) \*

Mark only one oval per row.

|                       | 0<br>(Passare<br>a<br>domanda<br>3) | 1                     | 2                     | 3                     | 4                     | 5                     | 6                     | 7                     |
|-----------------------|-------------------------------------|-----------------------|-----------------------|-----------------------|-----------------------|-----------------------|-----------------------|-----------------------|
| Prima dell'isolamento | <input type="radio"/>               | <input type="radio"/> | <input type="radio"/> | <input type="radio"/> | <input type="radio"/> | <input type="radio"/> | <input type="radio"/> | <input type="radio"/> |
| Durante l'isolamento  | <input type="radio"/>               | <input type="radio"/> | <input type="radio"/> | <input type="radio"/> | <input type="radio"/> | <input type="radio"/> | <input type="radio"/> | <input type="radio"/> |

676. 2. Quanto tempo in totale di solito trascorri in attività fisiche vigorose in uno di quei giorni?

(...minuti) prima dell'isolamento E (...minuti) durante l'isolamento

\_\_\_\_\_

677. 3. Su sette giorni, in quanti giorni hai svolto attività fisica moderata? (non includa "camminare) \*

Mark only one oval per row.

|                          | 0<br>(Passare<br>a<br>domanda<br>3) | 1                     | 2                     | 3                     | 4                     | 5                     | 6                     | 7                     |
|--------------------------|-------------------------------------|-----------------------|-----------------------|-----------------------|-----------------------|-----------------------|-----------------------|-----------------------|
| Prima<br>dell'isolamento | <input type="radio"/>               | <input type="radio"/> | <input type="radio"/> | <input type="radio"/> | <input type="radio"/> | <input type="radio"/> | <input type="radio"/> | <input type="radio"/> |
| Durante<br>l'isolamento  | <input type="radio"/>               | <input type="radio"/> | <input type="radio"/> | <input type="radio"/> | <input type="radio"/> | <input type="radio"/> | <input type="radio"/> | <input type="radio"/> |

678. 4. Quanto tempo in totale di solito trascorri in attività fisiche moderate in uno di quei giorni?

(...minuti) prima dell'isolamento E (...minuti) durante l'isolamento

---

679. 5. Durante sette giorni, in quanti giorni hai camminato/ fatto attività fisica moderata? \*

Mark only one oval per row.

|                          | 0<br>(Passare<br>a<br>domanda<br>3) | 1                     | 2                     | 3                     | 4                     | 5                     | 6                     | 7                     |
|--------------------------|-------------------------------------|-----------------------|-----------------------|-----------------------|-----------------------|-----------------------|-----------------------|-----------------------|
| Prima<br>dell'isolamento | <input type="radio"/>               | <input type="radio"/> | <input type="radio"/> | <input type="radio"/> | <input type="radio"/> | <input type="radio"/> | <input type="radio"/> | <input type="radio"/> |
| Durante<br>l'isolamento  | <input type="radio"/>               | <input type="radio"/> | <input type="radio"/> | <input type="radio"/> | <input type="radio"/> | <input type="radio"/> | <input type="radio"/> | <input type="radio"/> |

680. 6. Quanto tempo in totale trascorri camminando in uno di questi giorni?

(...minuti) prima dell'isolamento E (...minuti) durante l'isolamento

---

681. 7. Durante gli ultimi sette giorni, in un giorno della settimana, quanto tempo hai trascorso stando seduto? \*

(...ore) prima dell'isolamento E (...ore) durante l'isolamento

---

682. 8. Quanto è probabile che usi internet, i social media, le app, lo smartphone/smartwatch, fitness tracker per scopi riguardanti l'allenamento fisico? \*

Mark only one oval per row.

|                       | Mai                   | A volte               | Spesso                | Sempre                |
|-----------------------|-----------------------|-----------------------|-----------------------|-----------------------|
| Prima dell'isolamento | <input type="radio"/> | <input type="radio"/> | <input type="radio"/> | <input type="radio"/> |
| Durante l'isolamento  | <input type="radio"/> | <input type="radio"/> | <input type="radio"/> | <input type="radio"/> |

#### Adattamento Italiano della Scala: Short Diet Behavior Questionnaire

683. 1. Quanto spesso mangia cibo non salutare? (Altamente calorico, con molti zuccheri, grassi, sale, oli vegetali, a basso contenuto di fibre e vitamine? Es: Patatine fritte, torte, salse) \*

Mark only one oval per row.

|                       | Mai                   | A volte               | Spesso                | Sempre                |
|-----------------------|-----------------------|-----------------------|-----------------------|-----------------------|
| Prima dell'isolamento | <input type="radio"/> | <input type="radio"/> | <input type="radio"/> | <input type="radio"/> |
| Durante l'isolamento  | <input type="radio"/> | <input type="radio"/> | <input type="radio"/> | <input type="radio"/> |

684. 2. Quante volte le è capitato di mangiare senza controllo? (Binge-eating/ abbuffate) \*

Mark only one oval per row.

|                       | Mai                   | A volte               | Spesso                | Sempre                |
|-----------------------|-----------------------|-----------------------|-----------------------|-----------------------|
| Prima dell'isolamento | <input type="radio"/> | <input type="radio"/> | <input type="radio"/> | <input type="radio"/> |
| Durante l'isolamento  | <input type="radio"/> | <input type="radio"/> | <input type="radio"/> | <input type="radio"/> |

685. 3. Quanti pasti completi consuma al giorno (es. colazione, pranzo, cena) \*

Mark only one oval per row.

|                       | 1-2                   | 3                     | 4                     | 5                     | Più di 5              |
|-----------------------|-----------------------|-----------------------|-----------------------|-----------------------|-----------------------|
| Prima dell'isolamento | <input type="radio"/> |
| Durante l'isolamento  | <input type="radio"/> |

686. 4. Quanto spesso fa uno spuntino tra i pasti o a tarda sera? \*

Mark only one oval per row.

|                       | Mai                   | A volte               | Spesso                | Sempre                |
|-----------------------|-----------------------|-----------------------|-----------------------|-----------------------|
| Prima dell'isolamento | <input type="radio"/> | <input type="radio"/> | <input type="radio"/> | <input type="radio"/> |
| Durante l'isolamento  | <input type="radio"/> | <input type="radio"/> | <input type="radio"/> | <input type="radio"/> |

687. 5. Consuma quantità eccessive di alcool? (più di 5 bicchieri in una volta) \*

Mark only one oval per row.

|                       | Mai                   | A volte               | Spesso                | Sempre                |
|-----------------------|-----------------------|-----------------------|-----------------------|-----------------------|
| Prima dell'isolamento | <input type="radio"/> | <input type="radio"/> | <input type="radio"/> | <input type="radio"/> |
| Durante l'isolamento  | <input type="radio"/> | <input type="radio"/> | <input type="radio"/> | <input type="radio"/> |

688. 6. Quanto spesso usa internet, i social media, le app a scopi che riguardino la dieta? (es. preparare i pasti, conteggiare le calorie etc) \*

Mark only one oval per row.

|                       | Mai                   | A volte               | Spesso                | Sempre                |
|-----------------------|-----------------------|-----------------------|-----------------------|-----------------------|
| Prima dell'isolamento | <input type="radio"/> | <input type="radio"/> | <input type="radio"/> | <input type="radio"/> |
| Durante l'isolamento  | <input type="radio"/> | <input type="radio"/> | <input type="radio"/> | <input type="radio"/> |

PSQI Italian Version

1. Di solito a che ora va a letto la sera

689. 1a. Prima dell'isolamento (a che ora) \*

---

Example: 8:30 AM

690. 1b. Dopo l'isolamento (a che ora) \*

---

Example: 8:30 AM

691. 2. Di solito, quanto tempo (in minuti) impiega ad addormentarsi ogni notte? \*

(...minuti) prima dell'isolamento E (...minuti) durante l'isolamento

---

3. Quante ore ha dormito effettivamente per notte? (Potrebbero essere diverse dal numero di ore passate a letto)

692. 3a. Prima dell'isolamento (a che ora si è alzato) \*

---

Example: 8:30 AM

693. 3b. Dopo l'isolamento (a che ora si è alzato) \*

---

Example: 8:30 AM

694. 4. Quante ore ha dormito effettivamente per notte? (potrebbero essere diverse dal numero di ore passate a letto) \*

(...ore) prima dell'isolamento E (...ore) durante l'isolamento

---

5. Quanto spesso ha avuto problemi di sonno dovuti a...

## 695. 5.a Non riuscire ad addormentarsi entro 30 minuti \*

*Mark only one oval per row.*

|                       | No                    | Meno di una volta a settimana | Una o due volte a settimana | Tre o più volte a settimana |
|-----------------------|-----------------------|-------------------------------|-----------------------------|-----------------------------|
| Prima dell'isolamento | <input type="radio"/> | <input type="radio"/>         | <input type="radio"/>       | <input type="radio"/>       |
| Durante l'isolamento  | <input type="radio"/> | <input type="radio"/>         | <input type="radio"/>       | <input type="radio"/>       |

## 696. 5.b. Svegliarsi nel mezzo della notte o al mattino presto senza riaddormentarsi \*

*Mark only one oval per row.*

|                       | No                    | Meno di una volta a settimana | Una o due volte a settimana | Tre o più volte a settimana |
|-----------------------|-----------------------|-------------------------------|-----------------------------|-----------------------------|
| Prima dell'isolamento | <input type="radio"/> | <input type="radio"/>         | <input type="radio"/>       | <input type="radio"/>       |
| Durante l'isolamento  | <input type="radio"/> | <input type="radio"/>         | <input type="radio"/>       | <input type="radio"/>       |

## 697. 5.c. Alzarsi nel mezzo della notte per andare in bagno \*

*Mark only one oval per row.*

|                       | No                    | Meno di una volta a settimana | Una o due volte a settimana | Tre o più volte a settimana |
|-----------------------|-----------------------|-------------------------------|-----------------------------|-----------------------------|
| Prima dell'isolamento | <input type="radio"/> | <input type="radio"/>         | <input type="radio"/>       | <input type="radio"/>       |
| Durante l'isolamento  | <input type="radio"/> | <input type="radio"/>         | <input type="radio"/>       | <input type="radio"/>       |

## 698. 5.d. Non riuscire a respirare bene \*

*Mark only one oval per row.*

|                       | No                    | Meno di una volta a settimana | Una o due volte a settimana | Tre o più volte a settimana |
|-----------------------|-----------------------|-------------------------------|-----------------------------|-----------------------------|
| Prima dell'isolamento | <input type="radio"/> | <input type="radio"/>         | <input type="radio"/>       | <input type="radio"/>       |
| Durante l'isolamento  | <input type="radio"/> | <input type="radio"/>         | <input type="radio"/>       | <input type="radio"/>       |

## 699. 5.e. Sentire troppo caldo/freddo \*

*Mark only one oval per row.*

|                       | No                    | Meno di una volta a settimana | Una o due volte a settimana | Tre o più volte a settimana |
|-----------------------|-----------------------|-------------------------------|-----------------------------|-----------------------------|
| Prima dell'isolamento | <input type="radio"/> | <input type="radio"/>         | <input type="radio"/>       | <input type="radio"/>       |
| Durante l'isolamento  | <input type="radio"/> | <input type="radio"/>         | <input type="radio"/>       | <input type="radio"/>       |

## 700. 5.f. Altro (es: dolori, uso del telefono, brutti sogni etc) \*

*Mark only one oval per row.*

|                       | No                    | Meno di una volta a settimana | Una o due volte a settimana | Tre o più volte a settimana |
|-----------------------|-----------------------|-------------------------------|-----------------------------|-----------------------------|
| Prima dell'isolamento | <input type="radio"/> | <input type="radio"/>         | <input type="radio"/>       | <input type="radio"/>       |
| Durante l'isolamento  | <input type="radio"/> | <input type="radio"/>         | <input type="radio"/>       | <input type="radio"/>       |

701. 6. Quanto spesso ha preso farmaci (prescritti dal medico o meno) per aiutarsi a dormire? \*

Mark only one oval per row.

|                       | No                    | Meno di una volta a settimana | Una o due volte a settimana | Tre o più volte a settimana |
|-----------------------|-----------------------|-------------------------------|-----------------------------|-----------------------------|
| Prima dell'isolamento | <input type="radio"/> | <input type="radio"/>         | <input type="radio"/>       | <input type="radio"/>       |
| Durante l'isolamento  | <input type="radio"/> | <input type="radio"/>         | <input type="radio"/>       | <input type="radio"/>       |

702. 7. Quanto spesso ha avuto difficoltà a rimanere sveglia/o alla guida o nel corso di attività sociali? \*

Mark only one oval per row.

|                       | No                    | Meno di una volta a settimana | Una o due volte a settimana | Tre o più volte a settimana |
|-----------------------|-----------------------|-------------------------------|-----------------------------|-----------------------------|
| Prima dell'isolamento | <input type="radio"/> | <input type="radio"/>         | <input type="radio"/>       | <input type="radio"/>       |
| Durante l'isolamento  | <input type="radio"/> | <input type="radio"/>         | <input type="radio"/>       | <input type="radio"/>       |

703. 8. Ha avuto problemi ad avere energie sufficienti per concludere le sue normali attività? \*

Mark only one oval per row.

|                       | Nessun problema       | Piccoli problemi      | Qualche problema      | Grandi problemi       |
|-----------------------|-----------------------|-----------------------|-----------------------|-----------------------|
| Prima dell'isolamento | <input type="radio"/> | <input type="radio"/> | <input type="radio"/> | <input type="radio"/> |
| Durante l'isolamento  | <input type="radio"/> | <input type="radio"/> | <input type="radio"/> | <input type="radio"/> |

## 704. 9. Come valuta complessivamente la sua qualità del sonno? \*

*Mark only one oval per row.*

|                       | Molto buona           | Abbastanza buona      | Non molto buona       | Pessima               |
|-----------------------|-----------------------|-----------------------|-----------------------|-----------------------|
| Prima dell'isolamento | <input type="radio"/> | <input type="radio"/> | <input type="radio"/> | <input type="radio"/> |
| Durante l'isolamento  | <input type="radio"/> | <input type="radio"/> | <input type="radio"/> | <input type="radio"/> |

## Domande Aggiuntive

## 705. Indichi qual è la sua condizione attuale \*

*Mark only one oval.*

- ☐ Al momento, presto assistenza domiciliare gratuita (caregiver informale) ad una persona anziana (es. Coniugi, genitori, parenti, vicini)
- ☐ Un membro della mia famiglia (o un coniuge, un vicino o altri) mi presta assistenza domiciliare gratuitamente *Skip to question 709*
- ☐ Al momento, presto assistenza domiciliare professionale ad una persona anziana *Skip to question 710*
- ☐ Nessuna delle precedenti *Skip to question 713*

## Ragione della cura, situazione abitativa e onere della cura

## 706. Qual è la ragione del bisogno di assistenza? (è possibile selezionare più di una risposta) \*

*Check all that apply.*

- ☐ Età avanzata
- ☐ Demenza o deterioramento cognitivo

Other: ☐ \_\_\_\_\_

## 707. Qual è la sua condizione abitativa? \*

*Mark only one oval.*

- ☐ Abito con la persona di cui mi prendo cura
- ☐ Non abito con la persona di cui mi prendo cura

708. Quanto l'assistenza che presta grava sul suo senso di responsabilità/ sul suo livello di stress? \*

Mark only one oval per row.

|                                                   | Per<br>nulla          | Poco                  | Mediamente            | Molto                 | Moltissimo            |
|---------------------------------------------------|-----------------------|-----------------------|-----------------------|-----------------------|-----------------------|
| Prima delle misure restrittive dovute al COVID-19 | <input type="radio"/> |
| Durante le misure restrittive dovute al COVID-19  | <input type="radio"/> |

Skip to question 713

#### Ragione della cura

709. Qual è la ragione del bisogno di assistenza? \*

Check all that apply.

☐ Età avanzata

☐ Demenza o deterioramento cognitivo

Other: ☐ \_\_\_\_\_

Skip to question 713

#### Ragione e onere della cura

710. Indichi quali delle seguenti opzioni è applicabile alla sua condizione attuale \*

Mark only one oval.

☐ Al momento, presto assistenza domiciliare professionale ad una persona anziana

☐ Al momento, presto assistenza professionale ad una persona anziana presso una casa di cura (RSA)

711. Qual è la ragione del bisogno di assistenza? \*

Check all that apply.

☐ Età avanzata

☐ Demenza o deterioramento cognitivo

Other: ☐ \_\_\_\_\_

712. Quanto l'assistenza che presta grava sul suo senso di responsabilità/ sul suo livello di stress? \*

Mark only one oval per row.

|                                                   | Per<br>nulla          | Poco                  | Mediamente            | Molto                 | Moltissimo            |
|---------------------------------------------------|-----------------------|-----------------------|-----------------------|-----------------------|-----------------------|
| Prima delle misure restrittive dovute al COVID-19 | <input type="radio"/> |
| Durante le misure restrittive dovute al COVID-19  | <input type="radio"/> |

Skip to question 713

### Solitudine

713. Quanto si sente solo/a? \*

Mark only one oval per row.

|                                                   | Per<br>nulla          | Poco                  | Mediamente            | Molto                 | Moltissimo            |
|---------------------------------------------------|-----------------------|-----------------------|-----------------------|-----------------------|-----------------------|
| Prima delle misure restrittive dovute al COVID-19 | <input type="radio"/> |
| Durante le misure restrittive dovute al COVID-19  | <input type="radio"/> |

### Uso di tecnologie di comunicazione

714. Quali dei seguenti mezzi di comunicazione utilizzava PRIMA dell'isolamento per rimanere in contatto con gli altri e quanto si riteneva soddisfatto di questi? Se presta assistenza domiciliare gratuita ad un anziano, faccia riferimento agli strumenti che le consentono di rimanere in contatto con lui/lei \*

Mark only one oval per row.

|                                                         | Del tutto<br>insoddisfatto | Insoddisfatto         | Neutro                | Soddisfatto           | Molto<br>soddisfatto  | Non lo<br>usavo       |
|---------------------------------------------------------|----------------------------|-----------------------|-----------------------|-----------------------|-----------------------|-----------------------|
| Telefono                                                | <input type="radio"/>      | <input type="radio"/> | <input type="radio"/> | <input type="radio"/> | <input type="radio"/> | <input type="radio"/> |
| Videochiamate                                           | <input type="radio"/>      | <input type="radio"/> | <input type="radio"/> | <input type="radio"/> | <input type="radio"/> | <input type="radio"/> |
| Social Media                                            | <input type="radio"/>      | <input type="radio"/> | <input type="radio"/> | <input type="radio"/> | <input type="radio"/> | <input type="radio"/> |
| Piattaforme<br>online per<br>caregivers                 | <input type="radio"/>      | <input type="radio"/> | <input type="radio"/> | <input type="radio"/> | <input type="radio"/> | <input type="radio"/> |
| App di<br>messaggistica<br>istantanea (es.<br>Whatsapp) | <input type="radio"/>      | <input type="radio"/> | <input type="radio"/> | <input type="radio"/> | <input type="radio"/> | <input type="radio"/> |

715. Quali dei seguenti mezzi di comunicazione utilizza ORA per rimanere in contatto con gli altri e quanto ne è soddisfatto? Se si prende cura gratuitamente di un anziano, faccia riferimento agli strumenti che le consentono di rimanere in contatto con lui/lei \*

Mark only one oval per row.

|                                                         | Del tutto<br>insoddisfatto | Insoddisfatto         | Neutro                | Soddisfatto           | Del tutto<br>soddisfatto | Non lo<br>usavo       |
|---------------------------------------------------------|----------------------------|-----------------------|-----------------------|-----------------------|--------------------------|-----------------------|
| Telefono                                                | <input type="radio"/>      | <input type="radio"/> | <input type="radio"/> | <input type="radio"/> | <input type="radio"/>    | <input type="radio"/> |
| Videochiamata                                           | <input type="radio"/>      | <input type="radio"/> | <input type="radio"/> | <input type="radio"/> | <input type="radio"/>    | <input type="radio"/> |
| Social Media                                            | <input type="radio"/>      | <input type="radio"/> | <input type="radio"/> | <input type="radio"/> | <input type="radio"/>    | <input type="radio"/> |
| Piattaforme<br>online per<br>caregivers                 | <input type="radio"/>      | <input type="radio"/> | <input type="radio"/> | <input type="radio"/> | <input type="radio"/>    | <input type="radio"/> |
| App di<br>messaggistica<br>istantanea (es.<br>Whatsapp) | <input type="radio"/>      | <input type="radio"/> | <input type="radio"/> | <input type="radio"/> | <input type="radio"/>    | <input type="radio"/> |

716. Quali altri mezzi di comunicazione sta utilizzando? (Se non applicabile, salti questa domanda)

---

717. Quanto è soddisfatto di questi mezzi? (Se non applicabile, salti questa domanda)

*Mark only one oval.*

|                     | 1                     | 2                     | 3                     | 4                     | 5                     |                   |
|---------------------|-----------------------|-----------------------|-----------------------|-----------------------|-----------------------|-------------------|
| Molto insoddisfatto | <input type="radio"/> | Molto soddisfatto |

---

718. Pensiamo che sia molto importante tener conto della Sua opinione nello sviluppo e miglioria delle tecnologie che offrono supporto. Sarebbe interessato ad essere ricontattato per ricerche future? In caso affermativo, può indicare il suo indirizzo email (volontariamente)

---

"Effecten van sociale isolatie maatregelen op leefstijlgedrag tijdens de uitbraak van COVID-19 (ECLB-COVID19) "

In maart 2020 heeft de Wereldgezondheidsorganisatie (WHO) COVID-19 als een pandemie geclassificeerd. De WHO en volksgezondheidsautoriteiten over de hele wereld ondernemen actie om de uitbraak van COVID-19 te beperken door middel van fysiek contact te minimaliseren en zoveel mogelijk thuis te blijven. Deze crisissituatie zorgt voor stress onder de bevolking. Het identificeren van de exacte veranderingen in leefstijlgedrag tijdens de pandemie maatregelen (in vergelijking met vóór de pandemie maatregelen) kan helpen om effectieve oplossingen te vinden (bijv. ICT-gebaseerde oplossingen) om de mogelijke ongewenste psychosociale effecten van sociale isolatie te verzachten.

### Privacy/ gegevensbescherming

Gegevensbescherming is van het allergrrootste belang. Deze anonieme online enquête is uitsluitend ontworpen voor onderzoeksdoeleinden. Wij besteden in dit onderzoek speciale aandacht aan privacy en beschermen de verzamelde gegevens tegen toegang door derden, rekening houdend met de nieuwste regelgeving op het gebied van gegevensbescherming. De verzamelde informatie wordt strikt vertrouwelijk gehouden, uitsluitend gebruikt voor onderzoeksdoeleinden en zal nooit worden vrijgegeven aan anderen zonder toestemming van de participant. Om deel te nemen aan deze studie moet u 18 jaar of ouder zijn.

### Toestemming voor deelname

Door deze enquête in te vullen geeft u toestemming om anoniem deel te nemen aan deze studie.

If you are using your smartphone to answer this questionnaire, please drag the cursor to see all the possible answers

719. Land (eerste letter in hoofdletters) \*

---

720. Stad \*

---

721. Geslacht \*

*Mark only one oval.*

☐ Man

☐ Vrouw

☐ Other: 

---

722. Leeftijd (in jaren) \*

---

723. Opleidingsniveau \*

*Mark only one oval.*

☐ Geen scholing voltooid of basisonderwijs

☐ Voortgezet onderwijs (VMBO, HAVO, VWO)

☐ Middelbaar beroepsonderwijs (MBO)

☐ Bachelor diploma: Hoger beroepsonderwijs (HBO) of wetenschappelijk onderwijs (WO)

☐ Master diploma: WO of doctoraal

## 724. Burgerlijke staat \*

*Mark only one oval.*

- ☐ Alleenstaand
- ☐ Gehuwd/ partnerschap
- ☐ Weduwe/wedenaar/gescheiden

## 725. Wat is uw huidige arbeidsstatus? \*

*Check all that apply.*

- ☐ In loondienst
- ☐ Zelfstandig
- ☐ Werkloos
- ☐ Student
- ☐ Gepensioneerd
- ☐ Niet in staat om te werken
- ☐ Probleem door COVID-19 situatie (bijv. uit dienst getreden, lager salaris etc.)

Other: ☐ \_\_\_\_\_

## 726. Wat is uw huidige gezondheidstoestand? \*

*Check all that apply.*

- ☐ Gezond
- ☐ Met risicofactoren voor hart- en vaatziekten (bijv. hoge bloeddruk, roken, diabetes, obesitas, hoog cholesterolgehalte in het bloed, gebrek aan beweging)
- ☐ Met hart- en vaatziekte (bijv. Atherosclerose, beroerte, hartfalen, hartaandoening etc.)
- ☐ Met cognitieve beperking

## 727. Uzelf inbegrepen, hoeveel mensen wonen er in uw huishouden? \*

*Mark only one oval per row.*

|                          | 1                     | 2                     | 3                     | 4                     | 5                     | Meer dan 5            |
|--------------------------|-----------------------|-----------------------|-----------------------|-----------------------|-----------------------|-----------------------|
| Vóór sociale isolatie    | <input type="radio"/> |
| Tijdens sociale isolatie | <input type="radio"/> |

728. Denkt u dat u psychosociale ondersteuning nodig heeft? \*

Mark only one oval per row.

|                          | Nooit                 | Zelden                | Soms                  | Vaak                  | Altijd                |
|--------------------------|-----------------------|-----------------------|-----------------------|-----------------------|-----------------------|
| Vóór sociale isolatie    | <input type="radio"/> |
| Tijdens sociale isolatie | <input type="radio"/> |

Vragen over levenstevredenheid en mentaal welbevinden

### Korte vragenlijst levenstevredenheid

729. 1. In de meeste opzichten komt mijn leven dicht bij mijn ideaal. \*

Mark only one oval per row.

|                          | Helemaal oneens       | Oneens                | Beetje oneens         | Niet eens, niet oneens | Beetje eens           | Eens                  | Helemaal eens         |
|--------------------------|-----------------------|-----------------------|-----------------------|------------------------|-----------------------|-----------------------|-----------------------|
| Vóór sociale isolatie    | <input type="radio"/> | <input type="radio"/> | <input type="radio"/> | <input type="radio"/>  | <input type="radio"/> | <input type="radio"/> | <input type="radio"/> |
| Tijdens sociale isolatie | <input type="radio"/> | <input type="radio"/> | <input type="radio"/> | <input type="radio"/>  | <input type="radio"/> | <input type="radio"/> | <input type="radio"/> |

730. 2. Tot dusver heb ik de belangrijkste dingen die ik graag wilde in mijn leven gekregen. \*

Mark only one oval per row.

|                          | Helemaal oneens       | Oneens                | Beetje oneens         | Niet eens, niet oneens | Beetje eens           | Eens                  | Helemaal eens         |
|--------------------------|-----------------------|-----------------------|-----------------------|------------------------|-----------------------|-----------------------|-----------------------|
| Vóór sociale isolatie    | <input type="radio"/> | <input type="radio"/> | <input type="radio"/> | <input type="radio"/>  | <input type="radio"/> | <input type="radio"/> | <input type="radio"/> |
| Tijdens sociale isolatie | <input type="radio"/> | <input type="radio"/> | <input type="radio"/> | <input type="radio"/>  | <input type="radio"/> | <input type="radio"/> | <input type="radio"/> |

## 731. 3. Ik ben tevreden met mijn leven. \*

Mark only one oval per row.

|                                | Helemaal<br>oneens    | Oneens                | Beetje<br>oneens      | Niet eens,<br>niet<br>oneens | Beetje<br>eens        | Eens                  | Helemaal<br>eens      |
|--------------------------------|-----------------------|-----------------------|-----------------------|------------------------------|-----------------------|-----------------------|-----------------------|
| Vóór<br>sociale<br>isolatie    | <input type="radio"/> | <input type="radio"/> | <input type="radio"/> | <input type="radio"/>        | <input type="radio"/> | <input type="radio"/> | <input type="radio"/> |
| Tijdens<br>sociale<br>isolatie | <input type="radio"/> | <input type="radio"/> | <input type="radio"/> | <input type="radio"/>        | <input type="radio"/> | <input type="radio"/> | <input type="radio"/> |

## Korte vragenlijst mentaal welbevinden

## 732. 1. Ik was optimistisch over de toekomst. \*

Mark only one oval per row.

|                          | Nooit                 | Zelden                | Soms                  | Vaak                  | Altijd                |
|--------------------------|-----------------------|-----------------------|-----------------------|-----------------------|-----------------------|
| Vóór sociale isolatie    | <input type="radio"/> |
| Tijdens sociale isolatie | <input type="radio"/> |

## 733. 2. Ik voelde me nuttig. \*

Mark only one oval per row.

|                          | Nooit                 | Zelden                | Soms                  | Vaak                  | Altijd                |
|--------------------------|-----------------------|-----------------------|-----------------------|-----------------------|-----------------------|
| Vóór sociale isolatie    | <input type="radio"/> |
| Tijdens sociale isolatie | <input type="radio"/> |

## 734. 3. Ik voelde me ontspannen. \*

Mark only one oval per row.

|                          | Nooit                 | Zelden                | Soms                  | Vaak                  | Altijd                |
|--------------------------|-----------------------|-----------------------|-----------------------|-----------------------|-----------------------|
| Vóór sociale isolatie    | <input type="radio"/> |
| Tijdens sociale isolatie | <input type="radio"/> |

735. 4. Ik kon goed omgaan met problemen. \*

*Mark only one oval per row.*

|                          | Nooit                 | Zelden                | Soms                  | Vaak                  | Altijd                |
|--------------------------|-----------------------|-----------------------|-----------------------|-----------------------|-----------------------|
| Vóór sociale isolatie    | <input type="radio"/> |
| Tijdens sociale isolatie | <input type="radio"/> |

736. 5. Ik kon helder denken. \*

*Mark only one oval per row.*

|                          | Nooit                 | Zelden                | Soms                  | Vaak                  | Altijd                |
|--------------------------|-----------------------|-----------------------|-----------------------|-----------------------|-----------------------|
| Vóór sociale isolatie    | <input type="radio"/> |
| Tijdens sociale isolatie | <input type="radio"/> |

737. 6. Ik voelde een hechte band met andere mensen. \*

*Mark only one oval per row.*

|                          | Nooit                 | Zelden                | Soms                  | Vaak                  | Altijd                |
|--------------------------|-----------------------|-----------------------|-----------------------|-----------------------|-----------------------|
| Vóór sociale isolatie    | <input type="radio"/> |
| Tijdens sociale isolatie | <input type="radio"/> |

738. 7. Ik kon zelfstandig beslissingen nemen. \*

*Mark only one oval per row.*

|                          | Nooit                 | Zelden                | Soms                  | Vaak                  | Altijd                |
|--------------------------|-----------------------|-----------------------|-----------------------|-----------------------|-----------------------|
| Vóór sociale isolatie    | <input type="radio"/> |
| Tijdens sociale isolatie | <input type="radio"/> |

Vragenlijst sociale participatie

## 739. 1. Familie bezocht/ bezoek van familie \*

*Mark only one oval per row.*

|                          | Nooit                 | Zelden                | Soms                  | Vaak                  | Altijd                |
|--------------------------|-----------------------|-----------------------|-----------------------|-----------------------|-----------------------|
| Vóór sociale isolatie    | <input type="radio"/> |
| Tijdens sociale isolatie | <input type="radio"/> |

## 740. 2. Vrienden/ buren bezocht/ bezoek van vrienden of buren \*

*Mark only one oval per row.*

|                          | Nooit                 | Zelden                | Soms                  | Vaak                  | Altijd                |
|--------------------------|-----------------------|-----------------------|-----------------------|-----------------------|-----------------------|
| Vóór sociale isolatie    | <input type="radio"/> |
| Tijdens sociale isolatie | <input type="radio"/> |

## 741. 3. Bezocht kerk of religieuze activiteit/ groep \*

*Mark only one oval per row.*

|                          | Nooit                 | Zelden                | Soms                  | Vaak                  | Altijd                |
|--------------------------|-----------------------|-----------------------|-----------------------|-----------------------|-----------------------|
| Vóór sociale isolatie    | <input type="radio"/> |
| Tijdens sociale isolatie | <input type="radio"/> |

## 742. 4. Gebruikte internet/ social media voor communicatie \*

*Mark only one oval per row.*

|                          | Nooit                 | Zelden                | Soms                  | Vaak                  | Altijd                |
|--------------------------|-----------------------|-----------------------|-----------------------|-----------------------|-----------------------|
| Vóór sociale isolatie    | <input type="radio"/> |
| Tijdens sociale isolatie | <input type="radio"/> |

## 743. 5. Telefoonede voor sociale communicatie \*

*Mark only one oval per row.*

|                          | Nooit                 | Zelden                | Soms                  | Vaak                  | Altijd                |
|--------------------------|-----------------------|-----------------------|-----------------------|-----------------------|-----------------------|
| Vóór sociale isolatie    | <input type="radio"/> |
| Tijdens sociale isolatie | <input type="radio"/> |

## 744. 6. Bezocht café/ restaurant, bar of feest \*

*Mark only one oval per row.*

|                          | Nooit                 | Zelden                | Soms                  | Vaak                  | Altijd                |
|--------------------------|-----------------------|-----------------------|-----------------------|-----------------------|-----------------------|
| Vóór sociale isolatie    | <input type="radio"/> |
| Tijdens sociale isolatie | <input type="radio"/> |

## 745. 7. Bezocht bioscoop, theater of sportevenement \*

*Mark only one oval per row.*

|                          | Nooit                 | Zelden                | Soms                  | Vaak                  | Altijd                |
|--------------------------|-----------------------|-----------------------|-----------------------|-----------------------|-----------------------|
| Vóór sociale isolatie    | <input type="radio"/> |
| Tijdens sociale isolatie | <input type="radio"/> |

## 746. 8. Bezocht de sportschool of een sport cursus \*

*Mark only one oval per row.*

|                          | Nooit                 | Zelden                | Soms                  | Vaak                  | Altijd                |
|--------------------------|-----------------------|-----------------------|-----------------------|-----------------------|-----------------------|
| Vóór sociale isolatie    | <input type="radio"/> |
| Tijdens sociale isolatie | <input type="radio"/> |

## 747. 9. Een les gevolgd \*

*Mark only one oval per row.*

|                          | Nooit                 | Zelden                | Soms                  | Vaak                  | Altijd                |
|--------------------------|-----------------------|-----------------------|-----------------------|-----------------------|-----------------------|
| Vóór sociale isolatie    | <input type="radio"/> |
| Tijdens sociale isolatie | <input type="radio"/> |

## 748. 10. Had sociaal contact via andere activiteiten \*

*Mark only one oval per row.*

|                          | Nooit                 | Zelden                | Soms                  | Vaak                  | Altijd                |
|--------------------------|-----------------------|-----------------------|-----------------------|-----------------------|-----------------------|
| Vóór sociale isolatie    | <input type="radio"/> |
| Tijdens sociale isolatie | <input type="radio"/> |

## 749. 11. School-gerelateerde groep \*

*Mark only one oval per row.*

|                          | Nee                   | Ja                    |
|--------------------------|-----------------------|-----------------------|
| Vóór sociale isolatie    | <input type="radio"/> | <input type="radio"/> |
| Tijdens sociale isolatie | <input type="radio"/> | <input type="radio"/> |

## 750. 12. Vrijwilligersorganisatie of -groep \*

*Mark only one oval per row.*

|                          | Nee                   | Ja                    |
|--------------------------|-----------------------|-----------------------|
| Vóór sociale isolatie    | <input type="radio"/> | <input type="radio"/> |
| Tijdens sociale isolatie | <input type="radio"/> | <input type="radio"/> |

## 751. 13. Minderheden groep \*

*Mark only one oval per row.*

|                          | Nee                   | Ja                    |
|--------------------------|-----------------------|-----------------------|
| Vóór sociale isolatie    | <input type="radio"/> | <input type="radio"/> |
| Tijdens sociale isolatie | <input type="radio"/> | <input type="radio"/> |

## 752. 14. Andere groep (bijv. sport, dienstverlening etc.) \*

*Mark only one oval per row.*

|                          | Nee                   | Ja                    |
|--------------------------|-----------------------|-----------------------|
| Vóór sociale isolatie    | <input type="radio"/> | <input type="radio"/> |
| Tijdens sociale isolatie | <input type="radio"/> | <input type="radio"/> |

## Vragenlijst over stemming en gevoelens

## 753. 1. Ik voelde me ellendig of ongelukkig. \*

*Mark only one oval per row.*

|                          | 0 (niet waar)         | 1 (soms)              | 2 (waar)              |
|--------------------------|-----------------------|-----------------------|-----------------------|
| Vóór sociale isolatie    | <input type="radio"/> | <input type="radio"/> | <input type="radio"/> |
| Tijdens sociale isolatie | <input type="radio"/> | <input type="radio"/> | <input type="radio"/> |

## 754. 2. Ik genoot helemaal nergens van. \*

*Mark only one oval per row.*

|                          | 0 (niet waar)         | 1 (soms)              | 2 (waar)              |
|--------------------------|-----------------------|-----------------------|-----------------------|
| Vóór sociale isolatie    | <input type="radio"/> | <input type="radio"/> | <input type="radio"/> |
| Tijdens sociale isolatie | <input type="radio"/> | <input type="radio"/> | <input type="radio"/> |

755. 3. Ik voelde me zo moe dat ik rond hing en niets deed. \*

Mark only one oval per row.

|                          | 0 (niet waar)         | 1 (soms)              | 2 (waar)              |
|--------------------------|-----------------------|-----------------------|-----------------------|
| Vóór sociale isolatie    | <input type="radio"/> | <input type="radio"/> | <input type="radio"/> |
| Tijdens sociale isolatie | <input type="radio"/> | <input type="radio"/> | <input type="radio"/> |

756. 4. Ik was erg rusteloos. \*

Mark only one oval per row.

|                          | 0 (niet waar)         | 1 (soms)              | 2 (waar)              |
|--------------------------|-----------------------|-----------------------|-----------------------|
| Vóór sociale isolatie    | <input type="radio"/> | <input type="radio"/> | <input type="radio"/> |
| Tijdens sociale isolatie | <input type="radio"/> | <input type="radio"/> | <input type="radio"/> |

757. 5. Ik voelde mij nutteloos. \*

Mark only one oval per row.

|                          | 0 (niet waar)         | 1 (soms)              | 2 (waar)              |
|--------------------------|-----------------------|-----------------------|-----------------------|
| Vóór sociale isolatie    | <input type="radio"/> | <input type="radio"/> | <input type="radio"/> |
| Tijdens sociale isolatie | <input type="radio"/> | <input type="radio"/> | <input type="radio"/> |

758. 6. Ik huilde veel. \*

Mark only one oval per row.

|                          | 0 (niet waar)         | 1 (soms)              | 2 (waar)              |
|--------------------------|-----------------------|-----------------------|-----------------------|
| Vóór sociale isolatie    | <input type="radio"/> | <input type="radio"/> | <input type="radio"/> |
| Tijdens sociale isolatie | <input type="radio"/> | <input type="radio"/> | <input type="radio"/> |

759. 7. Ik vond het moeilijk om helder na te denken of me te concentreren. \*

Mark only one oval per row.

|                          | 0 (niet waar)         | 1 (soms)              | 2 (waar)              |
|--------------------------|-----------------------|-----------------------|-----------------------|
| Vóór sociale isolatie    | <input type="radio"/> | <input type="radio"/> | <input type="radio"/> |
| Tijdens sociale isolatie | <input type="radio"/> | <input type="radio"/> | <input type="radio"/> |

760. 8. Ik haatte mezelf. \*

Mark only one oval per row.

|                          | 0 (niet waar)         | 1 (soms)              | 2 (waar)              |
|--------------------------|-----------------------|-----------------------|-----------------------|
| Vóór sociale isolatie    | <input type="radio"/> | <input type="radio"/> | <input type="radio"/> |
| Tijdens sociale isolatie | <input type="radio"/> | <input type="radio"/> | <input type="radio"/> |

761. 9. Ik was een slecht persoon. \*

Mark only one oval per row.

|                          | 0 (niet waar)         | 1 (soms)              | 2 (waar)              |
|--------------------------|-----------------------|-----------------------|-----------------------|
| Vóór sociale isolatie    | <input type="radio"/> | <input type="radio"/> | <input type="radio"/> |
| Tijdens sociale isolatie | <input type="radio"/> | <input type="radio"/> | <input type="radio"/> |

762. 10. Ik voelde me eenzaam. \*

Mark only one oval per row.

|                          | 0 (niet waar)         | 1 (soms)              | 2 (waar)              |
|--------------------------|-----------------------|-----------------------|-----------------------|
| Vóór sociale isolatie    | <input type="radio"/> | <input type="radio"/> | <input type="radio"/> |
| Tijdens sociale isolatie | <input type="radio"/> | <input type="radio"/> | <input type="radio"/> |

763. 11. Ik dacht dat niemand echt van me hield. \*

Mark only one oval per row.

|                          | 0 (niet waar)         | 1 (soms)              | 2 (waar)              |
|--------------------------|-----------------------|-----------------------|-----------------------|
| Vóór sociale isolatie    | <input type="radio"/> | <input type="radio"/> | <input type="radio"/> |
| Tijdens sociale isolatie | <input type="radio"/> | <input type="radio"/> | <input type="radio"/> |

764. 12. Ik dacht dat ik nooit zo goed zou zijn als andere mensen. \*

Mark only one oval per row.

|                          | 0 (niet waar)         | 1 (soms)              | 2 (waar)              |
|--------------------------|-----------------------|-----------------------|-----------------------|
| Vóór sociale isolatie    | <input type="radio"/> | <input type="radio"/> | <input type="radio"/> |
| Tijdens sociale isolatie | <input type="radio"/> | <input type="radio"/> | <input type="radio"/> |

765. 13. Ik deed alles verkeerd. \*

Mark only one oval per row.

|                          | 0 (niet waar)         | 1 (soms)              | 2 (waar)              |
|--------------------------|-----------------------|-----------------------|-----------------------|
| Vóór sociale isolatie    | <input type="radio"/> | <input type="radio"/> | <input type="radio"/> |
| Tijdens sociale isolatie | <input type="radio"/> | <input type="radio"/> | <input type="radio"/> |

Vragenlijsten over beweeg- en eetgedrag

Korte vragenlijst beweeggedrag

766. 1. Op hoeveel dagen per week heeft u zware fysieke activiteiten gedaan (bijv. aerobics, lopen of snel fietsen)? \*

Mark only one oval per row.

|                               | 0<br>(verder<br>met<br>vraag<br>3) | 1                     | 2                     | 3                     | 4                     | 5                     | 6                     | 7                     |
|-------------------------------|------------------------------------|-----------------------|-----------------------|-----------------------|-----------------------|-----------------------|-----------------------|-----------------------|
| Vóór<br>sociale<br>islatie    | <input type="radio"/>              | <input type="radio"/> | <input type="radio"/> | <input type="radio"/> | <input type="radio"/> | <input type="radio"/> | <input type="radio"/> | <input type="radio"/> |
| Tijdens<br>sociale<br>islatie | <input type="radio"/>              | <input type="radio"/> | <input type="radio"/> | <input type="radio"/> | <input type="radio"/> | <input type="radio"/> | <input type="radio"/> | <input type="radio"/> |

767. 2. Hoeveel tijd (in minuten) heeft u op zo'n dag besteedt aan zware fysieke activiteiten?

(...min) vóór sociale isolatie EN (...min) tijdens socialte isolatie

\_\_\_\_\_

768. 3. Op hoeveel dagen per week heeft u matige fysieke activiteiten gedaan (bijv. fietsen aan een middelmatig tempo, zwemmen aan een middelmatig tempo of tennis dubbelspel)? (Wandelen niet inbegrepen) \*

Mark only one oval per row.

|                               | 0<br>(verder<br>met<br>vraag<br>3) | 1                     | 2                     | 3                     | 4                     | 5                     | 6                     | 7                     |
|-------------------------------|------------------------------------|-----------------------|-----------------------|-----------------------|-----------------------|-----------------------|-----------------------|-----------------------|
| Vóór<br>sociale<br>islatie    | <input type="radio"/>              | <input type="radio"/> | <input type="radio"/> | <input type="radio"/> | <input type="radio"/> | <input type="radio"/> | <input type="radio"/> | <input type="radio"/> |
| Tijdens<br>sociale<br>islatie | <input type="radio"/>              | <input type="radio"/> | <input type="radio"/> | <input type="radio"/> | <input type="radio"/> | <input type="radio"/> | <input type="radio"/> | <input type="radio"/> |

769. 4. Hoeveel tijd heeft u op zo'n dag besteedt aan matige fysieke activiteiten?

(...min) vóór sociale isolatie EN (...min) tijdens socialte isolatie

\_\_\_\_\_

770. 5. Op hoeveel dagen per week heeft u gewandeld gedurende minstens 10 minuten aan één stuk? \*

Mark only one oval per row.

|                          | 0<br>(verder met vraag 3) | 1                     | 2                     | 3                     | 4                     | 5                     | 6                     | 7                     |
|--------------------------|---------------------------|-----------------------|-----------------------|-----------------------|-----------------------|-----------------------|-----------------------|-----------------------|
| Vóór sociale isolatie    | <input type="radio"/>     | <input type="radio"/> | <input type="radio"/> | <input type="radio"/> | <input type="radio"/> | <input type="radio"/> | <input type="radio"/> | <input type="radio"/> |
| Tijdens sociale isolatie | <input type="radio"/>     | <input type="radio"/> | <input type="radio"/> | <input type="radio"/> | <input type="radio"/> | <input type="radio"/> | <input type="radio"/> | <input type="radio"/> |

771. 6. Hoeveel tijd heeft u op zo 'n dag gewandeld?  
(...min) vóór sociale isolatie EN (...min) tijdens sociale isolatie

---

772. 7. Hoeveel tijd heeft u gemiddeld gezeten op een weekdag? \*  
(...uren) vóór sociale isolatie EN (...uren) tijdens sociale isolatie

---

773. 8. Hoe waarschijnlijk acht u het dat u internet, social media, apps, smart watch/phone of een fitness tracker gebruikt voor fysieke activiteiten? \*

Mark only one oval per row.

|                          | Nooit                 | Soms                  | Meestal               | Altijd                |
|--------------------------|-----------------------|-----------------------|-----------------------|-----------------------|
| Vóór sociale isolatie    | <input type="radio"/> | <input type="radio"/> | <input type="radio"/> | <input type="radio"/> |
| Tijdens sociale isolatie | <input type="radio"/> | <input type="radio"/> | <input type="radio"/> | <input type="radio"/> |

Korte vragenlijst over uw eetpatroon

774. 1. Hoe waarschijnlijk is het dat u ongezond eet? (rijk aan calorieën uit suiker of vet, kleurstoffen, zout en tropische olieën; weinig vezels en vitamines, bijv. gefrituurde aardappelen, cakes, witte sauzen)? \*

Mark only one oval per row.

|                          | Nooit                 | Soms                  | Meestal               | Altijd                |
|--------------------------|-----------------------|-----------------------|-----------------------|-----------------------|
| Vóór sociale isolatie    | <input type="radio"/> | <input type="radio"/> | <input type="radio"/> | <input type="radio"/> |
| Tijdens sociale isolatie | <input type="radio"/> | <input type="radio"/> | <input type="radio"/> | <input type="radio"/> |

775. 2. Hoe vaak heeft u gemerkt dat uw eetgedrag uit de hand loopt (eetbuiën)? \*

Mark only one oval per row.

|                          | Nooit                 | Soms                  | Meestal               | Altijd                |
|--------------------------|-----------------------|-----------------------|-----------------------|-----------------------|
| Vóór sociale isolatie    | <input type="radio"/> | <input type="radio"/> | <input type="radio"/> | <input type="radio"/> |
| Tijdens sociale isolatie | <input type="radio"/> | <input type="radio"/> | <input type="radio"/> | <input type="radio"/> |

776. 3. Hoeveel hoofdmaaltijden nuttigt u dagelijks (bijv. ontbijt, lunch, diner)? \*

Mark only one oval per row.

|                          | 1 of 2                | 3                     | 4                     | 5                     | Meer dan 5            |
|--------------------------|-----------------------|-----------------------|-----------------------|-----------------------|-----------------------|
| Vóór sociale isolatie    | <input type="radio"/> |
| Tijdens sociale isolatie | <input type="radio"/> |

777. 4. Hoe waarschijnlijk acht u het dat u een snack neemt tussen de maaltijden door of 's avonds laat? (Beschouw elk stuk fruit, elke portie yoghurt of glas melk etc. als een enkele snack.) \*

Mark only one oval per row.

|                          | Nooit                 | Soms                  | Meestal               | Altijd                |
|--------------------------|-----------------------|-----------------------|-----------------------|-----------------------|
| Vóór sociale isolatie    | <input type="radio"/> | <input type="radio"/> | <input type="radio"/> | <input type="radio"/> |
| Tijdens sociale isolatie | <input type="radio"/> | <input type="radio"/> | <input type="radio"/> | <input type="radio"/> |

778. 5. Drinkt u 5 of meer glazen alcohol tijdens 1 gelegenheid (binge drinken)? \*

Mark only one oval per row.

|                          | Nooit                 | Soms                  | Meestal               | Altijd                |
|--------------------------|-----------------------|-----------------------|-----------------------|-----------------------|
| Vóór sociale isolatie    | <input type="radio"/> | <input type="radio"/> | <input type="radio"/> | <input type="radio"/> |
| Tijdens sociale isolatie | <input type="radio"/> | <input type="radio"/> | <input type="radio"/> | <input type="radio"/> |

779. 6. Hoe waarschijnlijk acht u het dat u internet, social media of apps gebruikt voor dieetdoeleinden (bijv. maaltijd bereiden, beheersen van calorieën etc.)? \*

Mark only one oval per row.

|                          | Nooit                 | Soms                  | Meestal               | Altijd                |
|--------------------------|-----------------------|-----------------------|-----------------------|-----------------------|
| Vóór sociale isolatie    | <input type="radio"/> | <input type="radio"/> | <input type="radio"/> | <input type="radio"/> |
| Tijdens sociale isolatie | <input type="radio"/> | <input type="radio"/> | <input type="radio"/> | <input type="radio"/> |

### Vragenlijst slaapkwaliteit

1. Om hoe laat bent u 's avonds gewoonlijk naar bed gegaan?

780. 1a. Vóór sociale isolatie (bedtijd) \*

Example: 8:30 AM

781. 1b. Tijdens sociale isolatie (bedtijd) \*

Example: 8:30 AM

782. 2. Hoeveel tijd (in minuten) had u gewoonlijk nodig om 's avonds in slaap te vallen? \*

(...min) vóór sociale isolatie EN (...min) tijdens sociale isolatie

3. Om hoe laat bent u gewoonlijk 's ochtends opgestaan?

## 783. 3a. Vóór sociale isolatie (tijdstip van opstaan) \*

---

Example: 8:30 AM

## 784. 3b. Tijdens sociale isolatie (tijdstip van opstaan) \*

---

Example: 8:30 AM

## 785. 4. Hoveel uren slaap hebt u 's nachts daadwerkelijk gehad? (Dit kan verschillend zijn van het aantal uren dat u in bed lag.) \*

(...uren) vóór sociale isolatie EN (...uren) tijdens sociale isolatie

---

## 5. Hoe vaak hebt u slaapproblemen gehad omdat u...

## 786. 5a. Niet kon inslapen binnen de 30 minuten \*

Mark only one oval per row.

|                             | Nooit                 | Minder dan<br>eenmaal per week | Een- of tweemaal<br>per week | Driemaal of meer<br>per week |
|-----------------------------|-----------------------|--------------------------------|------------------------------|------------------------------|
| Vóór sociale<br>isolatie    | <input type="radio"/> | <input type="radio"/>          | <input type="radio"/>        | <input type="radio"/>        |
| Tijdens sociale<br>isolatie | <input type="radio"/> | <input type="radio"/>          | <input type="radio"/>        | <input type="radio"/>        |

## 787. 5b. Wakker werd in het midden van de nacht of te vroeg 's ochtends \*

Mark only one oval per row.

|                             | Nooit                 | Minder dan<br>eenmaal per week | Een- of tweemaal<br>per week | Driemaal of meer<br>per week |
|-----------------------------|-----------------------|--------------------------------|------------------------------|------------------------------|
| Vóór sociale<br>isolatie    | <input type="radio"/> | <input type="radio"/>          | <input type="radio"/>        | <input type="radio"/>        |
| Tijdens sociale<br>isolatie | <input type="radio"/> | <input type="radio"/>          | <input type="radio"/>        | <input type="radio"/>        |

## 788. 5c. Moest opstaan om naar het toilet te gaan \*

*Mark only one oval per row.*

|                             | Nooit                 | Minder dan<br>eenmaal per week | Een- of tweemaal<br>per week | Driemaal of meer<br>per week |
|-----------------------------|-----------------------|--------------------------------|------------------------------|------------------------------|
| Vóór sociale<br>isolatie    | <input type="radio"/> | <input type="radio"/>          | <input type="radio"/>        | <input type="radio"/>        |
| Tijdens sociale<br>isolatie | <input type="radio"/> | <input type="radio"/>          | <input type="radio"/>        | <input type="radio"/>        |

## 789. 5d. Niet vrij kon ademen, luid hoestte of snurkte \*

*Mark only one oval per row.*

|                             | Nooit                 | Minder dan<br>eenmaal per week | Een- of tweemaal<br>per week | Driemaal of meer<br>per week |
|-----------------------------|-----------------------|--------------------------------|------------------------------|------------------------------|
| Vóór sociale<br>isolatie    | <input type="radio"/> | <input type="radio"/>          | <input type="radio"/>        | <input type="radio"/>        |
| Tijdens sociale<br>isolatie | <input type="radio"/> | <input type="radio"/>          | <input type="radio"/>        | <input type="radio"/>        |

## 790. 5e. Het te koud/ warm had \*

*Mark only one oval per row.*

|                             | Nooit                 | Minder dan<br>eenmaal per week | Een- of tweemaal<br>per week | Driemaal of meer<br>per week |
|-----------------------------|-----------------------|--------------------------------|------------------------------|------------------------------|
| Vóór sociale<br>isolatie    | <input type="radio"/> | <input type="radio"/>          | <input type="radio"/>        | <input type="radio"/>        |
| Tijdens sociale<br>isolatie | <input type="radio"/> | <input type="radio"/>          | <input type="radio"/>        | <input type="radio"/>        |

791. 5f. Andere redenen voor slaapproblemen had (bijv. pijn, telefoongebruik, nare dromen etc.) \*

Mark only one oval per row.

|                             | Nooit                 | Minder dan<br>eenmaal per week | Een- of tweemaal<br>per week | Driemaal of meer<br>per week |
|-----------------------------|-----------------------|--------------------------------|------------------------------|------------------------------|
| Vóór sociale<br>isolatie    | <input type="radio"/> | <input type="radio"/>          | <input type="radio"/>        | <input type="radio"/>        |
| Tijdens sociale<br>isolatie | <input type="radio"/> | <input type="radio"/>          | <input type="radio"/>        | <input type="radio"/>        |

792. 6. Hoe vaak hebt u geneesmiddelen genomen om u te helpen slapen (al dan niet op recept)? \*

Mark only one oval per row.

|                             | Nooit                 | Minder dan<br>eenmaal per week | Een- of tweemaal<br>per week | Driemaal of meer<br>per week |
|-----------------------------|-----------------------|--------------------------------|------------------------------|------------------------------|
| Vóór sociale<br>isolatie    | <input type="radio"/> | <input type="radio"/>          | <input type="radio"/>        | <input type="radio"/>        |
| Tijdens sociale<br>isolatie | <input type="radio"/> | <input type="radio"/>          | <input type="radio"/>        | <input type="radio"/>        |

793. 7. Hoe vaak hebt u de afgelopen maand moeite gehad om wakker te blijven tijdens het rijden, eten of deelnemen aan sociale activiteiten? \*

Mark only one oval per row.

|                             | Nooit                 | Minder dan<br>eenmaal per week | Een- of tweemaal<br>per week | Driemaal of meer<br>per week |
|-----------------------------|-----------------------|--------------------------------|------------------------------|------------------------------|
| Vóór sociale<br>isolatie    | <input type="radio"/> | <input type="radio"/>          | <input type="radio"/>        | <input type="radio"/>        |
| Tijdens sociale<br>isolatie | <input type="radio"/> | <input type="radio"/>          | <input type="radio"/>        | <input type="radio"/>        |

794. 8. Hoe moeilijk was het de afgelopen maand voor u om voldoende gemotiveerd te blijven om dingen gedaan te krijgen? \*

Mark only one oval per row.

|                          | Helemaal niet moeilijk | Een klein beetje moeilijk | Nogal moeilijk        | Heel moeilijk         |
|--------------------------|------------------------|---------------------------|-----------------------|-----------------------|
| Vóór sociale isolatie    | <input type="radio"/>  | <input type="radio"/>     | <input type="radio"/> | <input type="radio"/> |
| Tijdens sociale isolatie | <input type="radio"/>  | <input type="radio"/>     | <input type="radio"/> | <input type="radio"/> |

795. 9. Hoe zou u de kwaliteit van uw slaap in het algemeen beoordelen? \*

Mark only one oval per row.

|                          | Heel goed             | Redelijk goed         | Redelijk slecht       | Heel slecht           |
|--------------------------|-----------------------|-----------------------|-----------------------|-----------------------|
| Vóór sociale isolatie    | <input type="radio"/> | <input type="radio"/> | <input type="radio"/> | <input type="radio"/> |
| Tijdens sociale isolatie | <input type="radio"/> | <input type="radio"/> | <input type="radio"/> | <input type="radio"/> |

#### Bijkomende vragen

796. Selecteer a.u.b. wat op u het meest van toepassing is. \*

Mark only one oval.

- ☐ Ik verleen op dit moment onbetaalde zorg (mantelzorg) aan een oudere (bijv. een partner, ouders, ander familielid of buurman/-vrouw).
- ☐ Ik ontvang zelf mantelzorg (bijv. van partner of ander familielid etc.) en/ of professionele thuiszorg. Skip to question 800
- ☐ Ik verleen professionele zorg aan ouderen. Skip to question 801
- ☐ Geen Skip to question 804

#### Reden van zorg, woonsituatie en belasting

797. Wat is de reden van zorg? (meerdere antwoorden mogelijk) \*

Check all that apply.

- ☐ Ouderdom
- ☐ Dementie of milde cognitieve beperking (MCI)

Other: ☐ \_\_\_\_\_

798. Welke woonsituatie is op u van toepassing? \*

Mark only one oval.

- ☐ Ik woon in hetzelfde huis als degene voor wie ik zorg.
- ☐ Degene voor wie ik zorg woont niet bij mij in huis.

799. In welke mate ervaart u belasting/ stress als gevolg van uw zorgtaken? \*

Mark only one oval per row.

|                                    | Geen tot zeer<br>kleine mate | In kleine<br>mate     | In<br>gemiddelde<br>mate | In grote<br>mate      | In zeer<br>grote mate |
|------------------------------------|------------------------------|-----------------------|--------------------------|-----------------------|-----------------------|
| Vóór de COVID-19<br>maatregelen    | <input type="radio"/>        | <input type="radio"/> | <input type="radio"/>    | <input type="radio"/> | <input type="radio"/> |
| Tijdens de COVID-19<br>maatregelen | <input type="radio"/>        | <input type="radio"/> | <input type="radio"/>    | <input type="radio"/> | <input type="radio"/> |

Skip to question 804

#### Reden van zorg

800. Wat is de reden van zorg? (meerdere antwoorden mogelijk) \*

Check all that apply.

- ☐ Ouderdom
- ☐ Dementie of milde cognitieve beperking (MCI)

Other: ☐ \_\_\_\_\_

Skip to question 804

#### Zorgsetting, reden van zorg en belasting

801. Selecteer a.u.b. wat op u het meest van toepassing is. \*

Mark only one oval.

- ☐ Ik verleen professionele thuiszorg aan ouderen.
- ☐ Ik verleen zorg in de intramurale ouderenzorg.

802. Wat is de reden van zorg? (meerdere antwoorden mogelijk) \*

Check all that apply.

☐ Ouderdom

☐ Dementie of milde cognitieve beperking (MCI)

Other: ☐ \_\_\_\_\_

803. In welke mate ervaart u belasting/ stress als gevolg van uw zorgtaken? \*

Mark only one oval per row.

|                                    | Geen tot zeer<br>kleine mate | In kleine<br>mate     | In<br>gemiddelde<br>mate | In grote<br>mate      | In zeer<br>grote mate |
|------------------------------------|------------------------------|-----------------------|--------------------------|-----------------------|-----------------------|
| Vóór de COVID-19<br>maatregelen    | <input type="radio"/>        | <input type="radio"/> | <input type="radio"/>    | <input type="radio"/> | <input type="radio"/> |
| Tijdens de COVID-19<br>maatregelen | <input type="radio"/>        | <input type="radio"/> | <input type="radio"/>    | <input type="radio"/> | <input type="radio"/> |

Skip to question 804

### Eenzaamheid

804. In welke mate voelt u zich eenzaam? \*

Mark only one oval per row.

|                                    | Geen tot zeer<br>kleine mate | In kleine<br>mate     | In<br>gemiddelde<br>mate | In grote<br>mate      | In zeer<br>grote mate |
|------------------------------------|------------------------------|-----------------------|--------------------------|-----------------------|-----------------------|
| Vóór de COVID-19<br>maatregelen    | <input type="radio"/>        | <input type="radio"/> | <input type="radio"/>    | <input type="radio"/> | <input type="radio"/> |
| Tijdens de COVID-19<br>maatregelen | <input type="radio"/>        | <input type="radio"/> | <input type="radio"/>    | <input type="radio"/> | <input type="radio"/> |

### Gebruik van communicatietechnologie

805. Welke digitale communicatiemiddelen gebruikte u vóór de COVID-19 maatregelen om contact met anderen te houden en hoe tevreden was u over deze middelen? Voor personen die (mantel)zorg aan een oudere verlenen: richt u zich a.u.b. op de hulpmiddelen die u gebruikte om contact te houden met de persoon voor wie u zorgt. \*

Mark only one oval per row.

|                                          | Ze<br>er<br>ontevreden | Ontevreden            | Neutraal              | Tevreden              | Ze<br>er<br>tevreden  | Niet<br>gebruikt      |
|------------------------------------------|------------------------|-----------------------|-----------------------|-----------------------|-----------------------|-----------------------|
| Telefoon                                 | <input type="radio"/>  | <input type="radio"/> | <input type="radio"/> | <input type="radio"/> | <input type="radio"/> | <input type="radio"/> |
| Beeldbellen                              | <input type="radio"/>  | <input type="radio"/> | <input type="radio"/> | <input type="radio"/> | <input type="radio"/> | <input type="radio"/> |
| Social Media                             | <input type="radio"/>  | <input type="radio"/> | <input type="radio"/> | <input type="radio"/> | <input type="radio"/> | <input type="radio"/> |
| Online platforms<br>voor<br>(mantel)zorg | <input type="radio"/>  | <input type="radio"/> | <input type="radio"/> | <input type="radio"/> | <input type="radio"/> | <input type="radio"/> |
| Messenger apps                           | <input type="radio"/>  | <input type="radio"/> | <input type="radio"/> | <input type="radio"/> | <input type="radio"/> | <input type="radio"/> |

806. Welke digitale communicatiemiddelen gebruikt u op dit moment om contact met anderen te houden en hoe tevreden bent u over deze middelen? Voor personen die (mantel)zorg aan een oudere verlenen: richt u zich a.u.b. op de hulpmiddelen die u nu gebruikt om veilig contact te houden met de persoon voor wie u zorgt. \*

Mark only one oval per row.

|                                          | Ze<br>er<br>ontevreden | Ontevreden            | Neutraal              | Tevreden              | Ze<br>er<br>tevreden  | Niet<br>gebruikt      |
|------------------------------------------|------------------------|-----------------------|-----------------------|-----------------------|-----------------------|-----------------------|
| Telefoon                                 | <input type="radio"/>  | <input type="radio"/> | <input type="radio"/> | <input type="radio"/> | <input type="radio"/> | <input type="radio"/> |
| Beeldbellen                              | <input type="radio"/>  | <input type="radio"/> | <input type="radio"/> | <input type="radio"/> | <input type="radio"/> | <input type="radio"/> |
| Social Media                             | <input type="radio"/>  | <input type="radio"/> | <input type="radio"/> | <input type="radio"/> | <input type="radio"/> | <input type="radio"/> |
| Online platforms<br>voor<br>(mantel)zorg | <input type="radio"/>  | <input type="radio"/> | <input type="radio"/> | <input type="radio"/> | <input type="radio"/> | <input type="radio"/> |
| Messenger apps                           | <input type="radio"/>  | <input type="radio"/> | <input type="radio"/> | <input type="radio"/> | <input type="radio"/> | <input type="radio"/> |

807. Welk ander digitaal communicatiemiddel gebruikt u op dit moment nog meer? (Indien niet van toepassing, sla vraag over)

\_\_\_\_\_

808. Hoe tevreden bent u over dit communicatiemiddel? (Indien niet van toepassing, sla vraag over)

Mark only one oval.

|                 | 1                     | 2                     | 3                     | 4                     | 5                     |               |
|-----------------|-----------------------|-----------------------|-----------------------|-----------------------|-----------------------|---------------|
| Zeer ontevreden | <input type="radio"/> | Zeer tevreden |

809. Wij vinden het erg belangrijk om mensen te kunnen betrekken bij het ontwikkelen en het verbeteren van technologie die ondersteuning kan bieden. Zouden wij u mogen benaderen voor toekomstig onderzoek? Zo ja, dan kunt u hieronder uw e-mailadres voor ons achterlaten (vrijwillig).

---

Επιδράσεις του οικιακού περιορισμού σε πολλές συμπεριφορές τρόπου ζωής κατά τη διάρκεια της επιδημίας COVID-19 (ECLB-COVID19)

### Προστασία προσωπικών δεδομένων / Ασφάλεια

Η προστασία δεδομένων και η προστασία της ιδιωτικής ζωής είναι υψίστης σημασίας. Η παρούσα ανώνυμη διαδικτυακή έρευνα σχεδιάστηκε μόνο για ερευνητικούς σκοπούς. Στο ερευνητικό μας έργο δίνουμε ιδιαίτερη μέριμνα για την προστασία της ιδιωτικής ζωής και της ασφάλειας των δεδομένων και προσπαθούμε να προστατεύσουμε τα δεδομένα που συλλέγονται από τυχόν μη εξουσιοδοτημένη πρόσβαση τρίτων, λαμβάνοντας υπόψη τους πιο πρόσφατους κανονισμούς όσον αφορά την προστασία δεδομένων.

Συνεπώς, οι πληροφορίες που συλλέγονται στο ECLB-COVID19 διατηρούνται με αυστηρή εχεμύθεια. Κατά τη διαδικασία της ενημερωμένης συναίνεσης, οι συμμετέχοντες στην έρευνα είναι σίγουροι ότι τα δεδομένα που συλλέγονται θα χρησιμοποιηθούν μόνο για ερευνητικούς σκοπούς και δεν θα αποκαλυφθούν ούτε θα διατεθούν σε άλλους χωρίς τη συγκατάθεση του ατόμου. Ωστόσο, επειδή χρησιμοποιούμε τα Έντυπα Google, οι συμμετέχοντες πρέπει επίσης να αναγνωρίζουν την πολιτική απορρήτου της Google (<https://policies.google.com/privacy?hl=el>).

Πρέπει να είστε 18 ετών και άνω για να συμμετάσχετε σε αυτή τη μελέτη.

### Συγκατάθεση Συμμετοχής

Συμπληρώνοντας αυτήν την έρευνα, συμφωνείτε να συμμετέχετε ανώνυμα σε αυτή τη μελέτη.

If you are using your smartphone to answer this questionnaire, please drag the cursor to see all the possible answers

810. Χώρα (πρώτο γράμμα κεφαλαίο) \*

---

811. Πόλη \*

---
